# Supplementary material
Source: PubMed Central journal article supplement (PMC3619000)

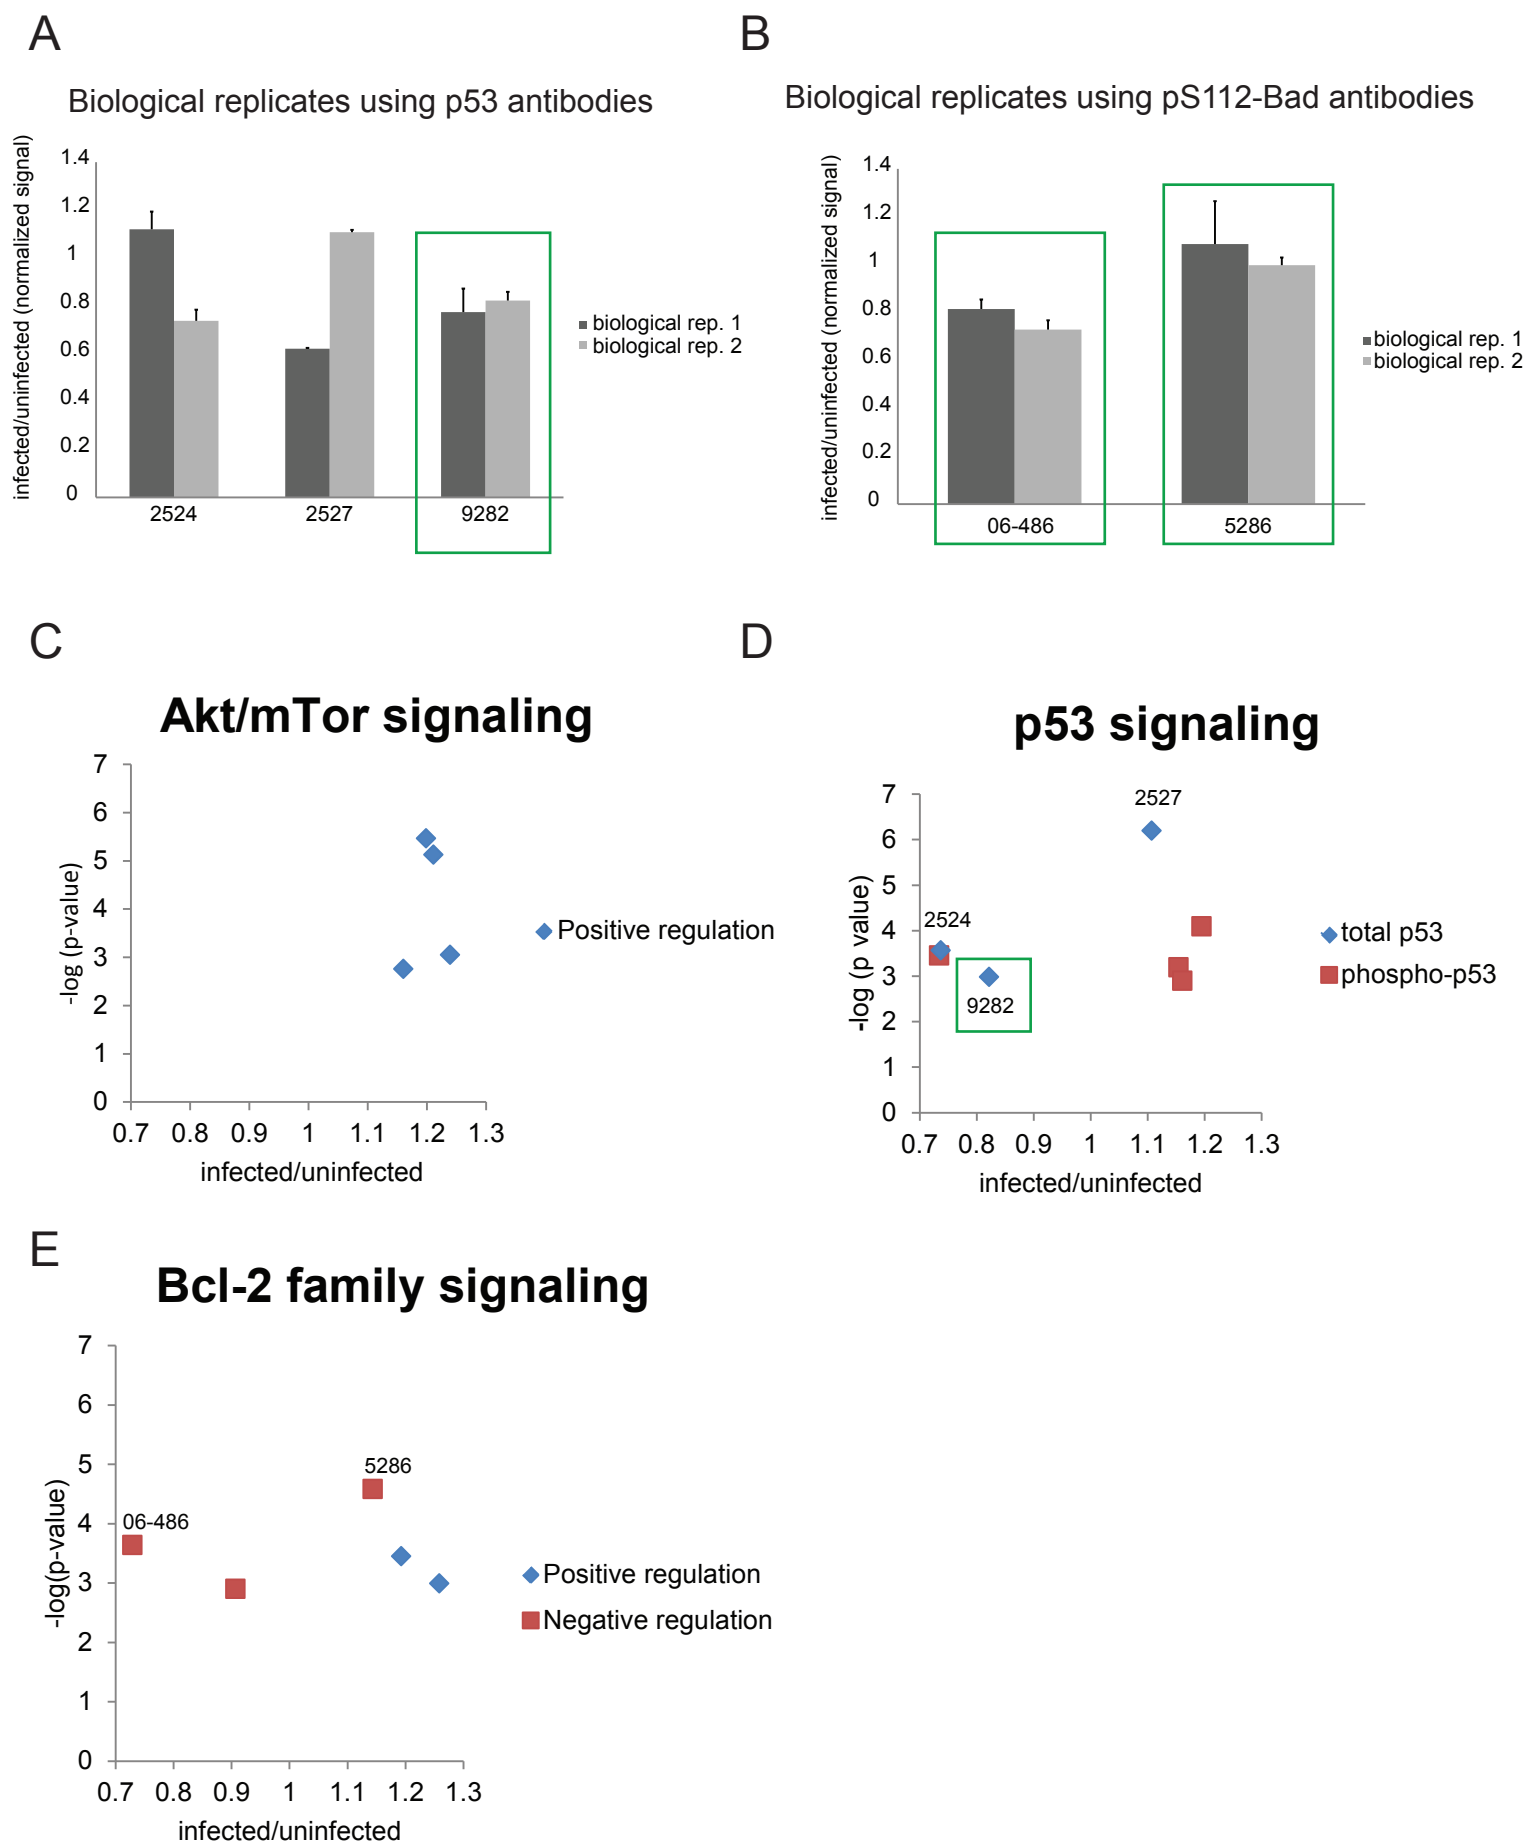

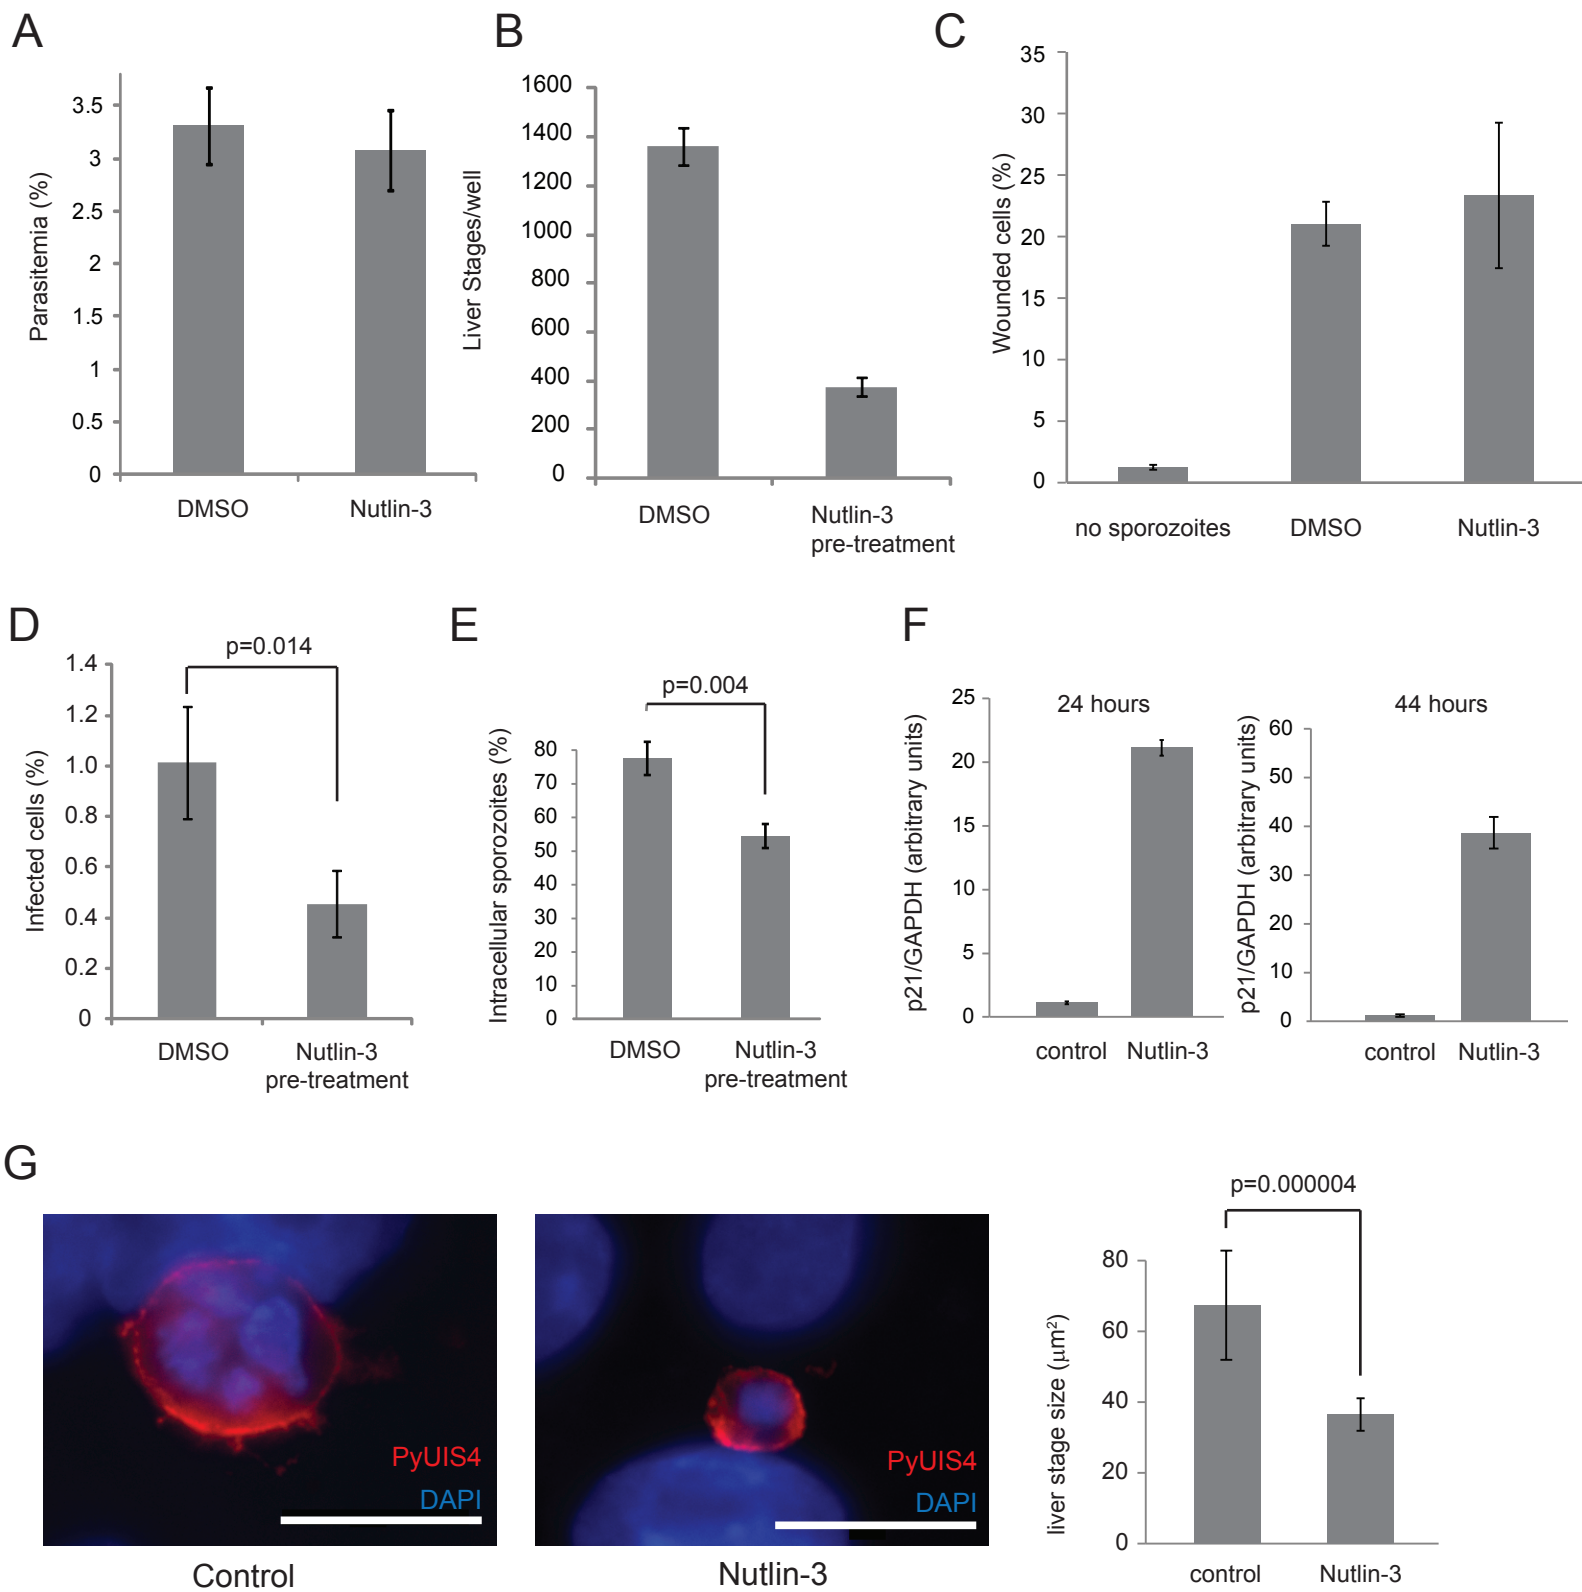

Supplement: NIHMS445888-supplement-02.pdf [file NIHMS445888-supplement-02.pdf]
